# Supplementary material for: YAP-Mediated Repression of HRK Regulates Tumor Growth, Therapy Response, and Survival Under Tumor Environmental Stress in Neuroblastoma
Source: Oxford University Press journal article supplement (doi:10.1158/0008-5472.can-20-0025), 2020-09-08
Supplement: 00085472can200025-sup-235000_2_supp_6527485_qfp77v.pdf [file 00085472can200025-sup-235000_2_supp_6527485_qfp77v.pdf]

## Supplementary Data

| Gene      | Pathway                       | Fold Change | P value  |
|-----------|-------------------------------|-------------|----------|
| DPYSL5    | Axon guidance                 | 8.35        | 0.00046  |
| EDN3      | cAMP signaling                | 5.63        | 0.0050   |
| HRK       | Apoptosis                     | 4.98        | 0.0012   |
| ADCYAP1R1 | cAMP signaling                | 4.90        | 0.0050   |
| CNTFR     | Cytokine receptor interaction | 4.57        | 0.014    |
| KCNQ2     | Cholinergic synapse           | 4.40        | 0.012    |
| ATP2B3    | cAMP signaling                | 4.21        | 0.0050   |
| UNC5A     | Axon guidance                 | 4.06        | 0.00046  |
| NGFR      | PI3K-Akt signaling            | 4.01        | 4.77e-11 |

**Supplementary Table S3.** Genes with highest positive fold changes (and upregulated with YAP inhibition) from RNA sequencing data.

\* For genes involved in multiple pathways, pathway listed is the one with the most significant p value.

| Gene    | Pathway                                          | Fold Change | P value  |
|---------|--------------------------------------------------|-------------|----------|
| PGK1    | HIF-1 signaling                                  | -2.99       | 0.025    |
| THBS4   | ECM receptor interaction                         | -2.84       | 3.69e-18 |
| GRIA3   | cAMP signaling                                   | -2.64       | 0.0050   |
| FLT1    | Focal adhesion                                   | -2.62       | 5.85e-17 |
| COL6A3  | ECM receptor interaction                         | -2.45       | 3.69e-18 |
| PTH1H   | Parathyroid hormone synthesis, secretion, action | -2.44       | 0.030    |
| CD44    | ECM receptor interaction                         | -2.43       | 3.69e-18 |
| GCG     | cAMP signaling                                   | -2.43       | 0.0050   |
| COLEC12 | Phagosome                                        | -2.33       | 1.05e-5  |

**Supplementary Table S4.** Genes with highest negative fold changes (and downregulated with YAP inhibition) from RNA sequencing data.

\* For genes involved in multiple pathways, pathway listed is the one with the most significant p value.
